# Supplementary material for: The Detection of Bacteria and Matrix Proteins on Clinically Benign and Pathologic Implants
Source: PubMed Central journal article supplement — Plast Reconstr Surg Glob Open. 2019 Feb 8;7(2):e2037. doi: 10.1097/GOX.0000000000002037 (PMC6416121; doi:10.1097/gox.0000000000002037), 2019-02-08
Supplement: gox-7-e2037-s001.pdf [file gox-7-e2037-s001.pdf]

FIG 3

|                                 | Pt#      | Surface  | No Growth | Gram (+)ve |     |        |        |        |          |        |
|---------------------------------|----------|----------|-----------|------------|-----|--------|--------|--------|----------|--------|
|                                 |          |          |           | S. epi     | CNS | S. aur | S. hom | S. coh | Bacillus | E. aur |
| Capsular Contracture            | 10       | TE (Rt)  | ■         |            |     |        |        |        |          |        |
|                                 |          | CAP (Lt) | ■         |            |     |        |        |        |          |        |
|                                 | 16       | IMP (Rt) | ■         |            |     |        |        |        |          |        |
|                                 | 26       | IMP (Rt) |           |            |     |        |        | ■      |          |        |
|                                 |          | CAP (Rt) |           |            |     |        |        |        |          | ■      |
|                                 | 27       | CAP (Rt) |           | ■          |     |        |        |        | ■        |        |
|                                 | 28       | CAP (Rt) | ■         |            |     |        |        |        |          |        |
|                                 |          | CAP (Lt) | ■         |            |     |        |        |        |          |        |
|                                 | 30       | IMP (Rt) |           |            |     |        |        |        | ■        |        |
|                                 |          | CAP (Rt) |           |            |     |        | ■      |        |          |        |
|                                 |          | IMP (Lt) |           | ■          |     | ■      |        |        |          |        |
|                                 |          | CAP (Lt) | ■         |            |     |        |        |        |          |        |
|                                 | 31       | IMP (Lt) | ■         |            |     |        |        |        |          |        |
|                                 |          | CAP (Lt) | ■         |            |     |        |        |        |          |        |
|                                 | 32       | CAP (Rt) |           | ■          |     |        |        |        |          |        |
|                                 | CAP (Lt) |          | ■         |            |     |        |        |        |          |        |
| Double Capsule;<br>Seroma (-)ve | 15       | TE (Rt)  | ■         |            |     |        |        |        |          |        |
|                                 |          | CAP (Rt) | ■         |            |     |        |        |        |          |        |
| 22                              | IMP (Lt) |          | ■         |            |     |        |        |        |          |        |
| Double Capsule;<br>Seroma (+)ve | 26       | IMP (Lt) |           |            |     |        | ■      |        |          |        |
|                                 |          | CAP (Lt) | ■         |            |     |        |        |        |          |        |
|                                 | 29       | IMP (Rt) | ■         |            |     |        |        |        |          |        |
|                                 |          | CAP (Rt) | ■         |            |     |        |        |        |          |        |
|                                 |          | IMP (Lt) |           |            |     |        | ■      |        |          |        |
|                                 |          | CAP (Lt) |           | ■          |     |        |        |        |          |        |
| 33                              | IMP (Lt) | ■        |           |            |     |        |        |        |          |        |
| Infection                       | 25       | TE (Rt)  |           |            | ■   |        |        |        |          |        |
|                                 |          | CAP (Rt) |           |            | ■   |        |        |        |          |        |
